# Supplementary material for: A Tale of Two Seasons: Distinct Seasonal Viral Communities in a Thermokarst Lake
Source: MDPI journal article supplement (doi:10.3390/microorganisms11020428), 2023-02-08
Supplement: s1 [file s1]

**Table S1.** Results from the quast analysis of the assembly.

|                            |            |
|----------------------------|------------|
| # contigs (>= 0 bp)        | 5 448 354  |
| # contigs (>= 1000 bp)     | 602 394    |
| # contigs (>= 5000 bp)     | 34 119     |
| # contigs (>= 10000 bp)    | 9 938      |
| # contigs (>= 25000 bp)    | 1 933      |
| # contigs (>= 50000 bp)    | 382        |
| Total length (>= 0 bp)     | 3.61E+09   |
| Total length (>= 1000 bp)  | 1.35E+09   |
| Total length (>= 5000 bp)  | 3.61E+08   |
| Total length (>= 10000 bp) | 1.99E+08   |
| Total length (>= 25000 bp) | 82 324 394 |
| Total length (>= 50000 bp) | 29 713 317 |
| # contigs                  | 2 115 508  |
| Largest contig             | 362 592    |
| Total length               | 2.36E+09   |
| GC (%)                     | 44.71      |
| N75                        | 710        |
| L50                        | 447 562    |
| L75                        | 1 110 151  |
| # N's per 100 kbp          | 0          |

**Table S2.** Samples used for comparisons

| Location         | Type (subtype)      | Depth          | Season | Sequencing technology | Online availability            | Authors                |
|------------------|---------------------|----------------|--------|-----------------------|--------------------------------|------------------------|
| Lough Neagh      | Water (Epilimnion)  | NA             | Summer | Illumina              | NCBI Bioproject<br>PRJNA292054 | Arkhipova et al., 2017 |
|                  | Water (Epilimnion)  | NA             | Winter | MiSeq                 |                                |                        |
| Stordalen Mire   | Soil (Palsa)        | 0.01m to 0.85m | Summer | Illumina<br>NextSeq   | NCBI Bioproject<br>PRJNA386568 | Woodcroft et al., 2018 |
|                  | Soil (Fen)          | 0.01m to 0.5m  | Summer |                       |                                |                        |
|                  | Soil (Bog)          | 0.01m to 0.33m | Summer |                       |                                |                        |
| Bonanza Creek    | Soil (Permafrost)   | 0.3m to 0.7m   | Summer | Illumina<br>HiSeq     | IMG/M ID<br>Gs0063124          | Hultman et al., 2015   |
|                  | Soil (Palsa)        |                | Summer |                       |                                |                        |
|                  | Soil (Bog)          |                | Summer |                       |                                |                        |
| Lake Croche      | Water (Epilimnion)  | 0m             | Winter | Illumina<br>HiSeq     | NCBI Bioproject<br>PRJNA480789 | Tran et al., 2018      |
|                  | Water (Epilimnion)  | 0m             | Summer |                       |                                |                        |
|                  | Water (Metalimnion) | 3m             | Summer |                       |                                |                        |
| Lake Simoncouche | Water (Epilimnion)  | 1m             | Winter | Illumina<br>HiSeq     | NCBI Bioproject<br>PRJNA480789 | Tran et al., 2018      |
|                  | Water (Epilimnion)  | 1m             | Summer |                       |                                |                        |
|                  | Water (Metalimnion) | 5m             | Summer |                       |                                |                        |

**Table S3.** Sample characteristics

| <b>Triplicate name</b> | <b>Sampling condition</b> | <b>Depth (m)</b>   | <b>Temperature (°C)</b> | <b>Specific conductivity (μS/cm)</b> | <b>Oxygen (%)</b> |
|------------------------|---------------------------|--------------------|-------------------------|--------------------------------------|-------------------|
| 2015 surface           | Summer surface            | 0                  | 12.75                   | 44.4                                 | 45.6              |
| 2015 oxycline          | Summer oxycline           | 0.5                | 11.95                   | 45.2                                 | 9.2               |
| 2016 below the ice     | Winter                    | Just below the ice | 0.45                    | 68.5                                 | 0                 |
| 2017 surface           | Summer surface            | 0.5                | 10.05                   | 42.33                                | 50.1              |
| 2017 bottom            | Summer bottom             | 2.0                | 4.23                    | 110.39                               | 1.4               |

**Table S4.** Library characteristics

| <b>Sample</b>      | <b>Triplicate</b> | <b>DNA used (ng)</b> | <b>Library preparation kit</b> | <b>Sequencing technology</b> | <b>Raw file size (reads)</b> | <b>Trimmed file size (reads)</b> |
|--------------------|-------------------|----------------------|--------------------------------|------------------------------|------------------------------|----------------------------------|
| 2015 surface       | 1                 | 1.0                  | Accel NGS 1S                   | Illumina HiSeq               | 13 633 701                   | 13 438 653                       |
|                    | 1                 | 2.32                 | NEB Next Ultra                 | Illumina HiSeq               | 8 545 048                    | 8 111 690                        |
|                    | 2                 | 1.0                  | Accel NGS 1S                   | Illumina HiSeq               | 5 291 007                    | 5 215 055                        |
|                    | 3                 | 0.81                 | Accel NGS 1S                   | Illumina HiSeq               | 23 913 350                   | 23 574 775                       |
| 2015 oxycline      | 1                 | 1.0                  | Accel NGS 1S                   | Illumina HiSeq               | 8 367 577                    | 8 248 095                        |
|                    | 1                 | 3.02                 | NEB Next Ultra                 | Illumina HiSeq               | 8 062 946                    | 7 837 543                        |
|                    | 2                 | 0.83                 | Accel NGS 1S                   | Illumina HiSeq               | 25 578 878                   | 25 219 877                       |
|                    | 2                 | 9.96                 | KAPA Hyper Prep Kit            | Illumina MiSeq               | 3 279 190                    | 1 222 274                        |
|                    | 3                 | 1.0                  | Accel NGS 1S                   | Illumina HiSeq               | 14 387 116                   | 14 182 824                       |
| 2016 below the ice | 1                 | 1.0                  | Accel NGS 1S                   | Illumina HiSeq               | 12 338 461                   | 12 159 565                       |
|                    | 2                 | 1.0                  | Accel NGS 1S                   | Illumina HiSeq               | 17 696 802                   | 17 453 340                       |
|                    | 3                 | 1.0                  | Accel NGS 1S                   | Illumina HiSeq               | 15 126 049                   | 14 902 871                       |
| 2017 surface       | 1                 | 1.0                  | Accel NGS 1S                   | Illumina HiSeq               | 15 209 956                   | 15 000 826                       |
|                    | 2                 | 1.0                  | Accel NGS 1S                   | Illumina HiSeq               | 19 783 638                   | 19 498 139                       |
|                    | 3                 | 1.0                  | Accel NGS 1S                   | Illumina HiSeq               | 16 900 776                   | 16 660 469                       |
| 2017 bottom        | 1                 | 1.0                  | Accel NGS 1S                   | Illumina HiSeq               | 24 953 491                   | 24 589 829                       |
|                    | 2                 | 1.0                  | Accel NGS 1S                   | Illumina HiSeq               | 19 892 594                   | 19 608 039                       |
|                    | 3                 | 1.0                  | Accel NGS 1S                   | Illumina HiSeq               | 18 492 753                   | 18 226 369                       |

**Table S5.** Distribution of vOTUs containing integrase genes

| <b>Triplicate name</b> | <b>Number of vOTUs containing integrase</b> | <b>% of vOTUs containing integrase</b> |
|------------------------|---------------------------------------------|----------------------------------------|
| 2015 surface           | 24                                          | 3.10                                   |
| 2015 oxycline          | 25                                          | 3.16                                   |
| 2016 below the ice     | 25                                          | 3.14                                   |
| 2017 surface           | 25                                          | 2.52                                   |
| 2017 bottom            | 27                                          | 2.93                                   |

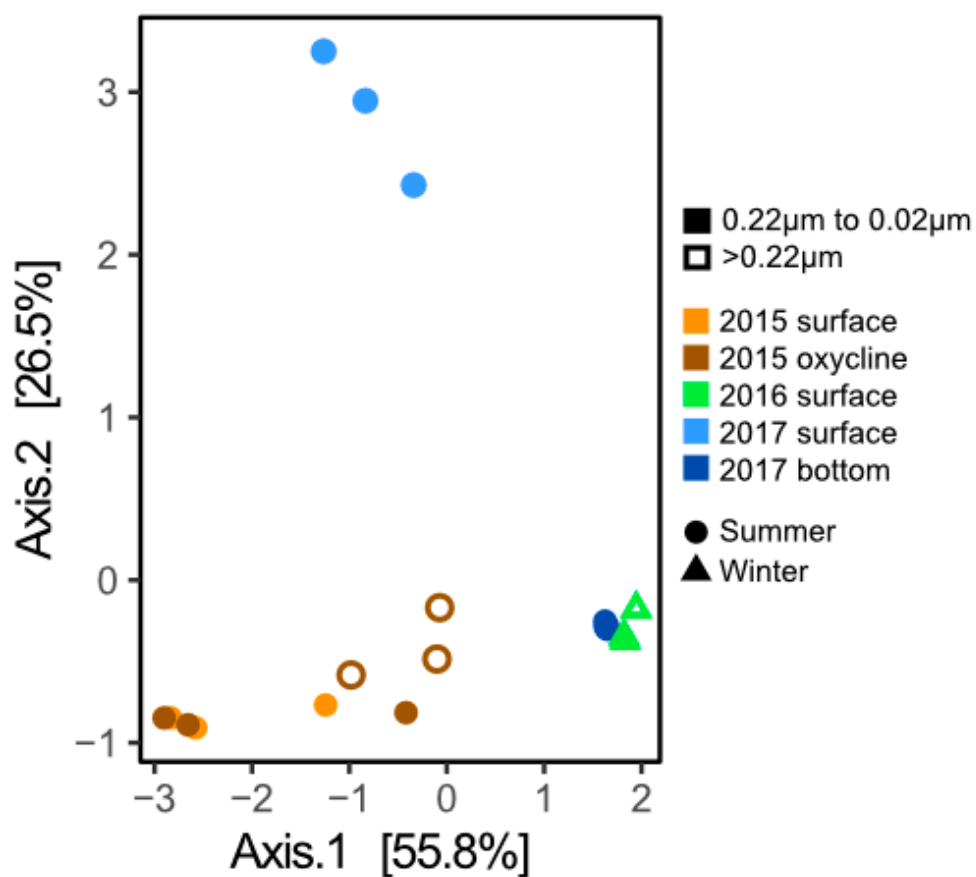

**Figure S1.** Representation of beta diversity of viral communities from the SAS 2A thermokarst lake in cellular ( $>0.22\ \mu\text{m}$ ) and viral enriched ( $0.22\ \mu\text{m}$  to  $0.02\ \mu\text{m}$ ) fractions. Beta diversity is represented using a principal coordinates analysis (PCoA) graph made using the Euclidean distance between viral communities.
